# Supplementary material
Source: Springer Nature journal article supplement (https://www.springermedizin.de/resource/supplementary/12879_2009_1297_MOESM1_ESM.pdf/9442288)

**A: Total number of patients**

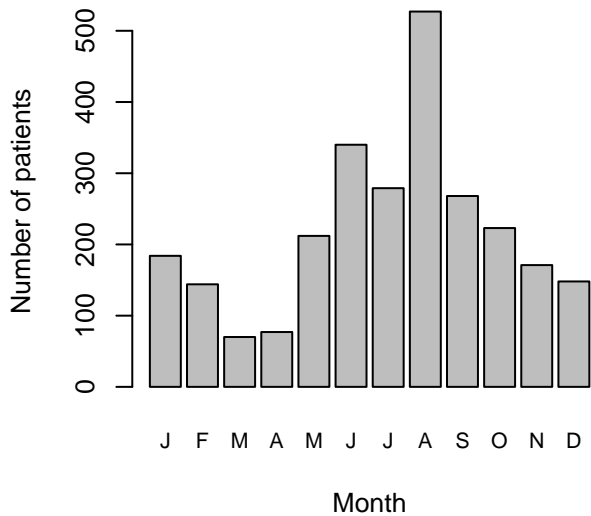

**B: IgG positive**

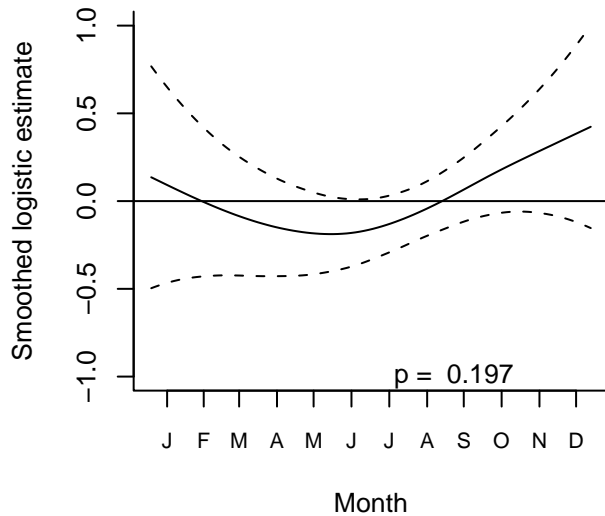

**C: IgM positive**

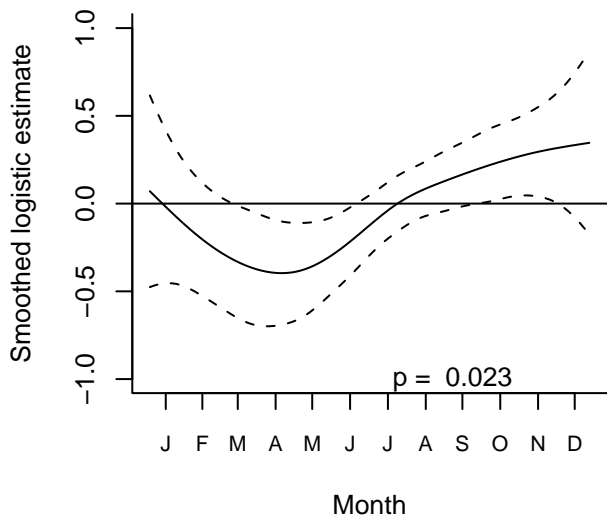

**D: Treated**

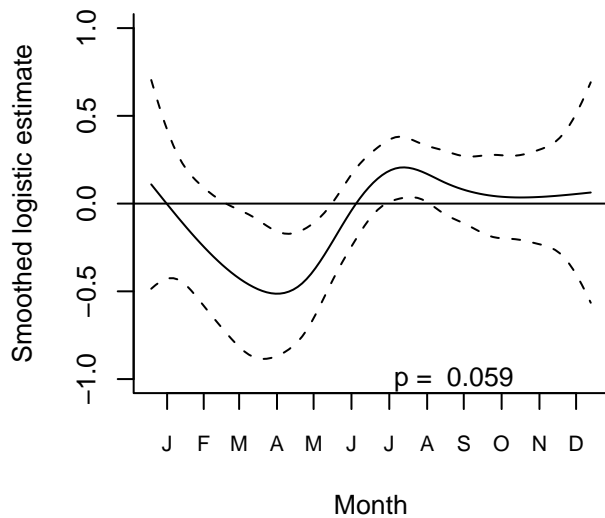

Supplement: MOESM1 [file 9442288]
